# Supplementary material for: Diagnostically analyzing 1H NMR spectra of sub-types in chaetoglobosins for dereplication
Source: Royal Society of Chemistry journal article supplement (doi:10.1039/c9ra10434h), 2020-01-01
Supplement: c9ra10434h1.pdf [file c9ra10434h1.pdf]

## Supporting Information

### Diagnostically Analyzing $^1\text{H}$ NMR Spectra of Sub-types in Chaetoglobosins for Dereplication

Chen Lin,<sup>be</sup>Jian-chun Qin,<sup>ce</sup> Yong-gang Zhang,<sup>\*d</sup> and Gang Ding<sup>\*a</sup>

Chaetoglobosin B (**2**) = (G-type + e-type)

The Fig. S1 is the full  $^1\text{H}$  NMR spectrum of analog **2** in  $\text{CDCl}_3$ . The proton signals in the down-fielded zone are nearly same as that of chaetoglobosin A, which implied that this compound also contain the e-type in macrocyclic ring (Fig. S1). In the high-field, there are two singlet methyl groups (chemical shift values over 1.5 ppm implying their connection with double bond) suggesting the presence of a double bond C-5/C-6. In addition, a proton signal with the chemical shift value at 3.94 ppm (doublet,  $J = 9.5$  Hz, H-7) is observed, which reveals that C-7 should possess a free hydroxyl group. This demonstrated that G-type of perhydro-isoindolone moiety must be present in this chaetoglobosin (Fig. S2). Thus this compound belongs to the combination of G-type and e-type, which meets the structural features of chaetoglobosin B.

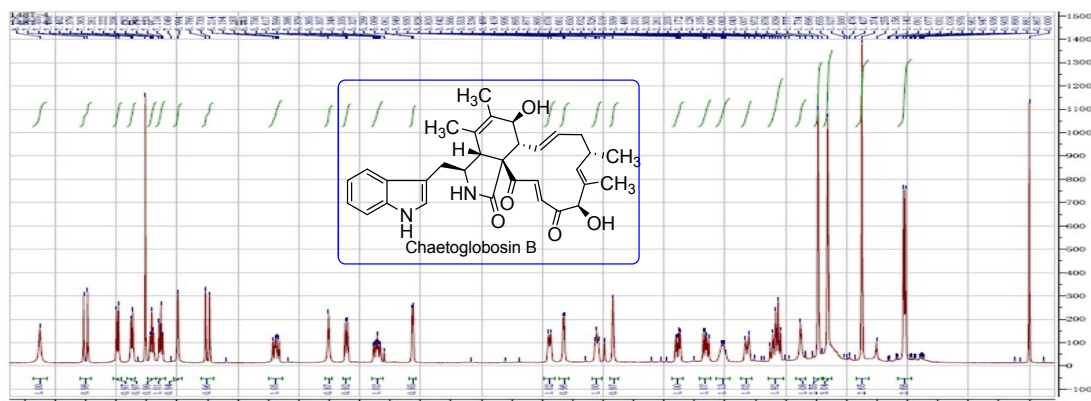

Figure S1. The full spectrum of chaetoglobosin B (**2**) in  $\text{CDCl}_3$

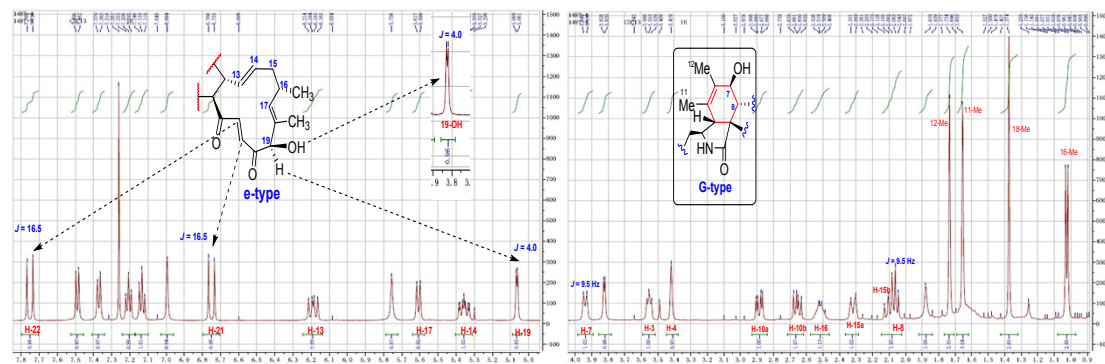

Figure S2. Expanded  $^1\text{H}$  NMR spectrum of chaetoglobosin B (**2**) in  $\text{CDCl}_3$

Chaetoglobosin V (**3**) = (G-type + j-type)

The  $^1\text{H}$  NMR spectrum of analog **3** is done in  $\text{DMSO}-d_6$  (Fig. S3). In the down-fielded zone, there are three active protons, in which the unique proton signal at 9.00 ppm (19-OH) implied the existence of j-type, and this is further supported by the disappearance of olefinic proton H-17 signal and the chemical shift value of 18-Me down-fielded to 1.90 ppm (Fig. S4). The H-7 as doublet peak at 4.67 ( $J = 8.0$  Hz) together with 11-Me and 12-Me as two singlet establishes the G-type of the perhydroisoindolone moiety. Though several proton signals are overlapped significantly in the high-fielded zone, considering the interals and chemical shift values of these protons, it meet the combination of G and j sub-types. Thus this analog was determined to be chaetoglobosin V.

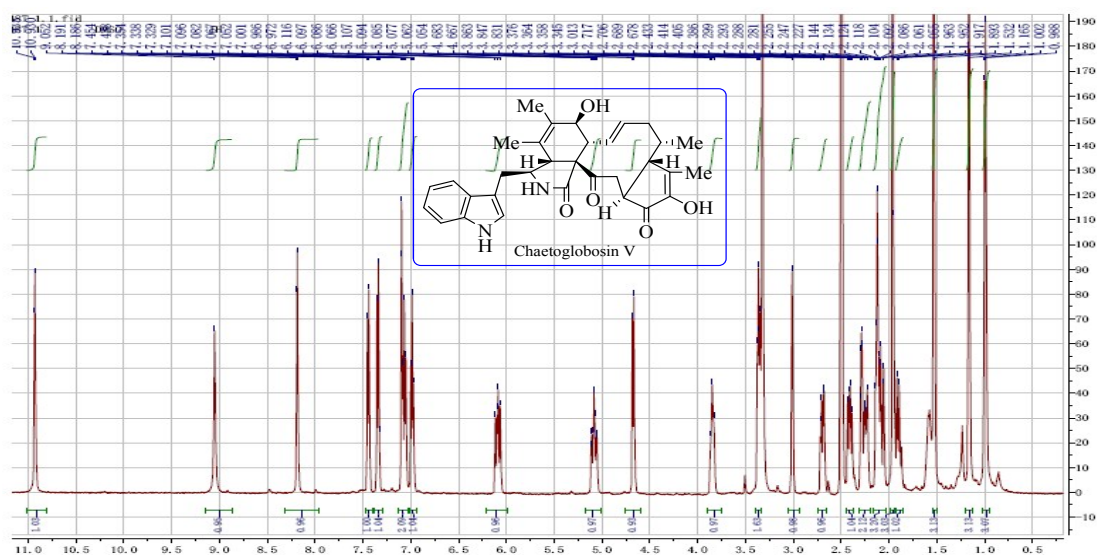

Figure S3. The full spectrum of chaetoglobosin V (**3**) in  $\text{DMSO}-d_6$

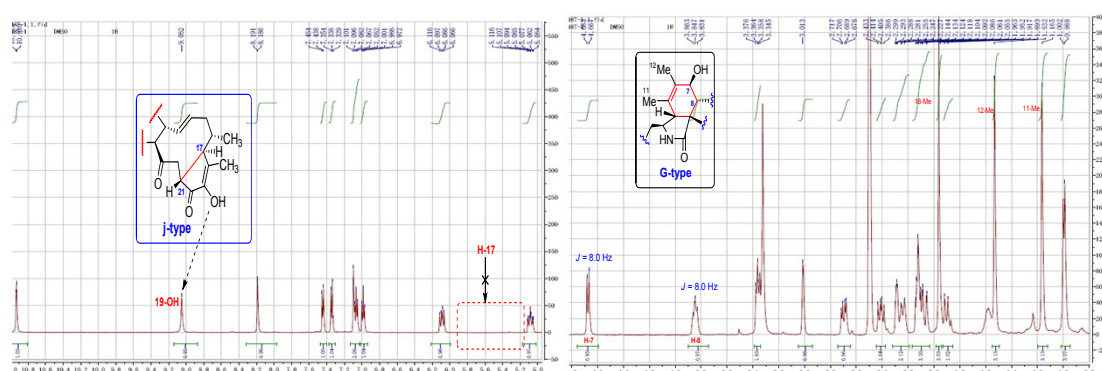

Figure S4. Expanded  $^1\text{H}$  NMR spectrum of of chaetoglobosin V (**3**) in  $\text{DMSO}-d_6$

Isochaetoglobosin D (**4**) = (E-type + i-type) (Fig. S5)

The  $^1\text{H}$  NMR spectrum of compound **4** displayed only three methyl groups in the high field and one pair of terminal olefinic protons at 4.96 and 5.18 ppm, which implied that C-6 and C-12 must shape the corresponding double bond. The proton signal at 3.69 ppm (dd,  $J = 5.5, 4.5$  Hz, H-7) coupled with the signal at 4.70 ppm (d,  $J = 5.5$  Hz, 7-OH) together with the 11-Me as a doublet peak confirms that this compound possesses E-type in perhydro-isoindolone ring (Fig. S6). The *trans*-olefinic protons of H-21 and H-22 are not observed in down-fielded zone indicating these two carbons C-21/22 as methylene units. Considering the chemical shift value of H-17 being down-fielded to 5.86 ppm [ $-19\text{C}=\text{O}-18\text{C}(\text{CH}_3)=17\text{CH}$ ] and interals in the high-field zones together with no additional oxymethine observed, this demonstrated that both C-19 and C-20 must be two keto-groups, which matches the i-type in the macrocyclic ring system (Fig. S6). Thus this compound is determined to be iso chaetoglobosin D (E-type + i-type).

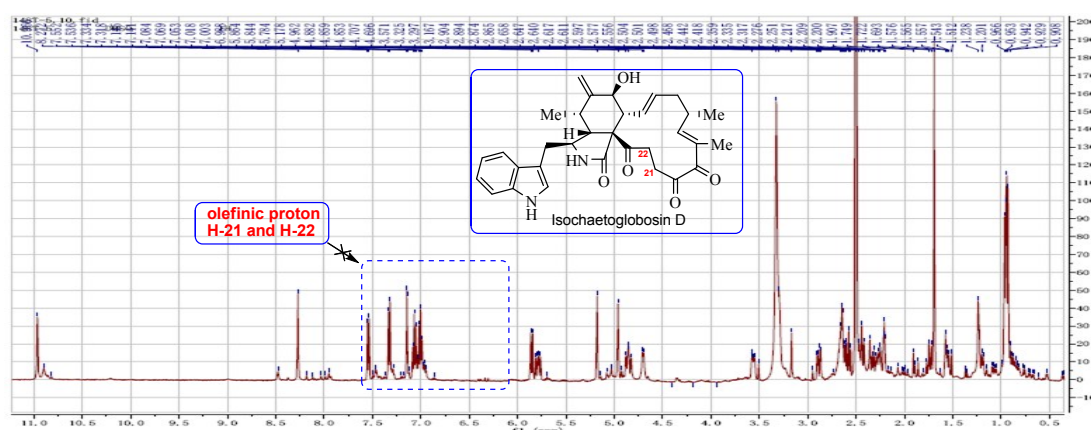

Figure S5. The full spectrum of iso chaetoglobosin D in  $\text{DMSO}-d_6$

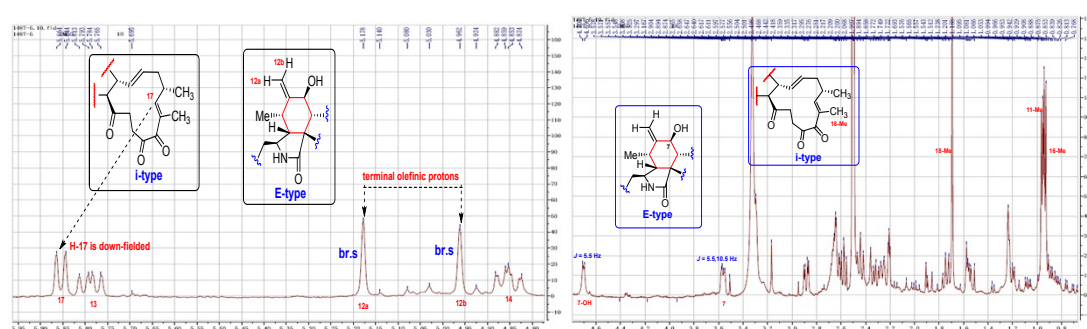

Figure S6. Expanded  $^1\text{H}$  NMR spectrum of iso chaetoglobosin D in  $\text{DMSO}-d_6$

Chaetoglobosin E (**5**) = (G-type + g-type)

The  $^1\text{H}$  NMR spectrum of compound **5** (in  $\text{DMSO}-d_6$ ) reveals that this analog does not possess the double bond H-21/H-22 in macrocyclic ring (Fig. S7). The low chemical shift value of H-17 at 6.28 ppm indicates that C-19 possesses the keto-group

[-19C=O-18C(CH<sub>3</sub>)=17CH]. The doublet doublet peak at 4.70 ppm ( $J = 6.5, 12.5$  Hz, H-20) coupled with the doublet signal at 4.78 ppm ( $J = 6.5$  Hz, 20-OH) suggests that C-20 contains a free hydroxyl group. This implies that g-type is found in this compound (Fig. S8). The big coupling constant between 4.49 ppm (doublet, H-7) and 3.62 ppm (triplet, H-8) along with the two methyls as singlet peaks ( $\delta_{\text{H}} = 1.52$  and 1.11 ppm) confirm the existence of G-type (Fig. S8). This result revealed that this analog possesses the combination of G and g types, which establish its structure as chaetoglobosin E.

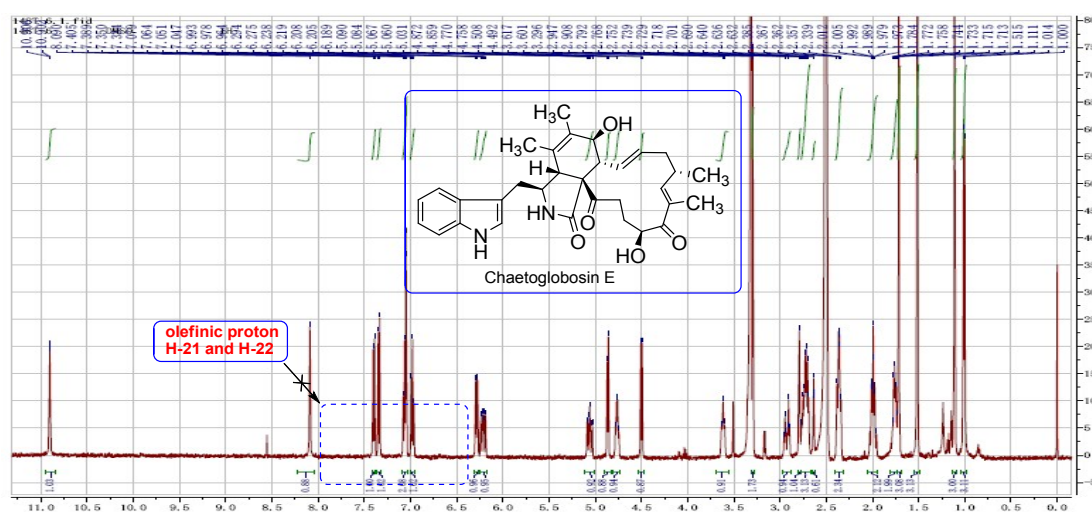

Figure S7. The full spectrum of chaetoglobosin E in DMSO-*d*<sub>6</sub>

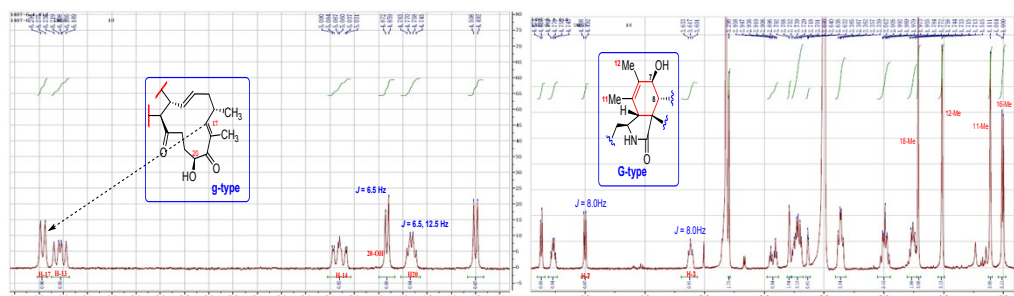

Figure S8. Expanded <sup>1</sup>H NMR spectrum of chaetoglobosin E in DMSO-*d*<sub>6</sub>

Chaetoglobosin G (**6**) = (G-type + i-type)

The analog **6** do not possess the double bond C-21 and C-22 from the analysis of the down-fielded zone in the <sup>1</sup>H NMR spectrum in CDCl<sub>3</sub> (Fig. S9). The down-fielded chemical shift value of H-17 (6.08 ppm) and absence of 20-oxymethine proton signal in the spectrum implied i-type of the macrocyclic ring. The high-fielded zone of analog **6** implied the existence of G-type with a double bond at C-5 and C-6, and a free hydroxyl group at C-7 same as that of chaetoglobosin E (**5**) (Fig. S10). Thus analog **6** is determined to chaetoglobosin G on the basis of analyzing the <sup>1</sup>H NMR

spectrum.

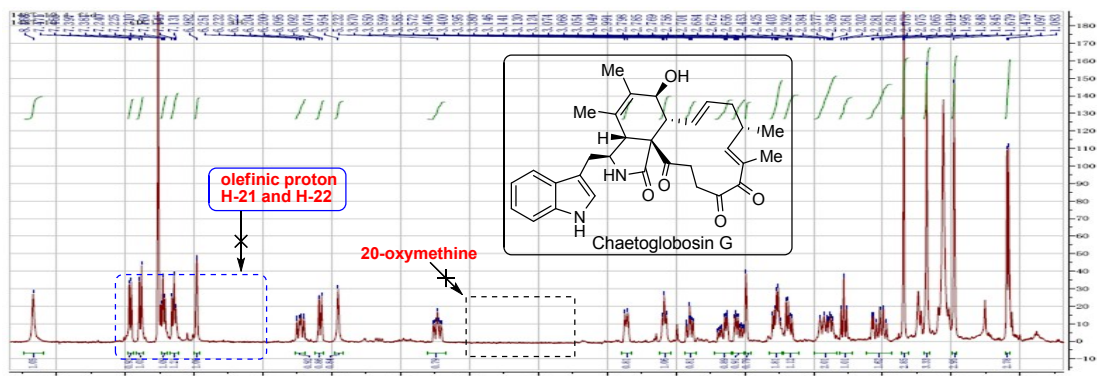

Figure S9. The full spectrum of chaetoglobosin G in CDCl<sub>3</sub>

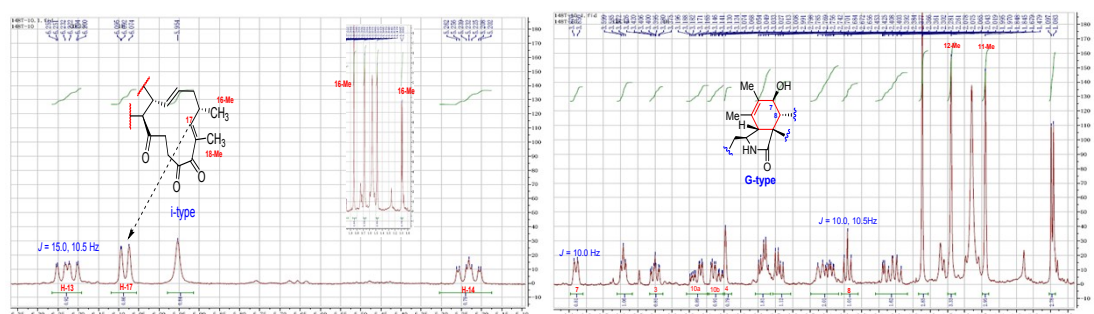

Figure S10. Expanded <sup>1</sup>H NMR spectrum of chaetoglobosin G in CDCl<sub>3</sub>

Chaetoglobosin R (7) = (D-type + e-type)

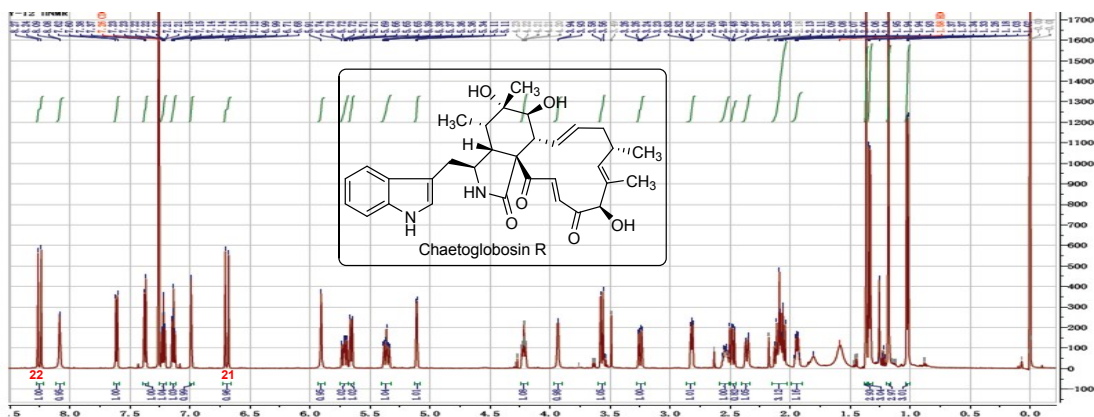

Figure S11. The full spectrum of chaetoglobosin R in CDCl<sub>3</sub>

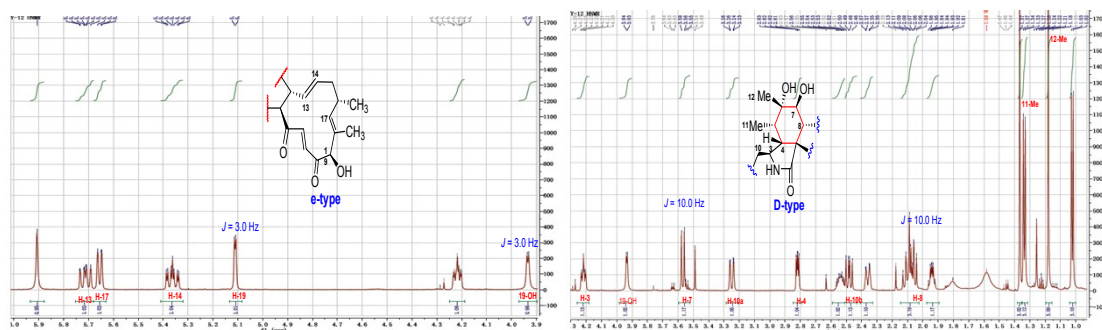

Figure S12. Expanded <sup>1</sup>H NMR spectrum of chaetoglobosin R in CDCl<sub>3</sub>

The down-fielded proton signals in the analog **7** implied that this compound possesses the e-type in the macrocyclic ring system same as those of chaetoglobosins A and B (Fig. S11). In the high-fielded zone, there exists a singlet (12-Me) and doublet methyl (11-Me) except for the 16-Me and 18-Me, which implies that compound **7** might contain C or D-types in the perhydro-isoindolone moiety. Yet the proton signal at 3.57 ppm (doublet,  $J_{7,8} = 10.0$  Hz, H-7) coupled with the peak at 2.06 ppm (H-8) denotes that C-7 must possess a free hydroxyl group not the epoxide group at C-6 and C-7. Thus it reveals the existence of 6, 7-diol group in compound **7**, which confirms the D-type contained in this compound (Fig. S12). Literature searching reveals that both chaetoglobosins Q and R possess the D-type plus e-type with different stereochemistry at C-12. Comparison of the  $^1\text{H}$  NMR data established the analog **7** to be chaetoglobosin R.

Prochaetoglobosin IIIed (**8**) = (G-type + d-type)

The high-fielded zone of analog **8** displays the diagnostic signals of G-type as those of chaetoglobosins B, E and G (Fig. S13/14). The olefinic protons of H-21 and H-22 with chemical values at 6.72 and 7.62 ppm, respectively, implied that the C-20 possesses a keto-group. The chemical shift value of H-17 is not down-fielded compared chaetoglobosins D, E and G, which demonstrates that C-19 does not contain the keto-group. In addition, two proton signals as doublets at 3.57 (H-19a) and 3.02 ppm (H-19b) with big coupling constants ( $J = 11.0$  Hz) are observed. This speculation reveals that C-19 must be a methylene unit, which confirms that analog **8** possess d-type in the macrocyclic ring system (Fig. S13/14). Finally, this compound (**8**) is elucidated to be prochaetoglobosin IIIed compared with literatures.

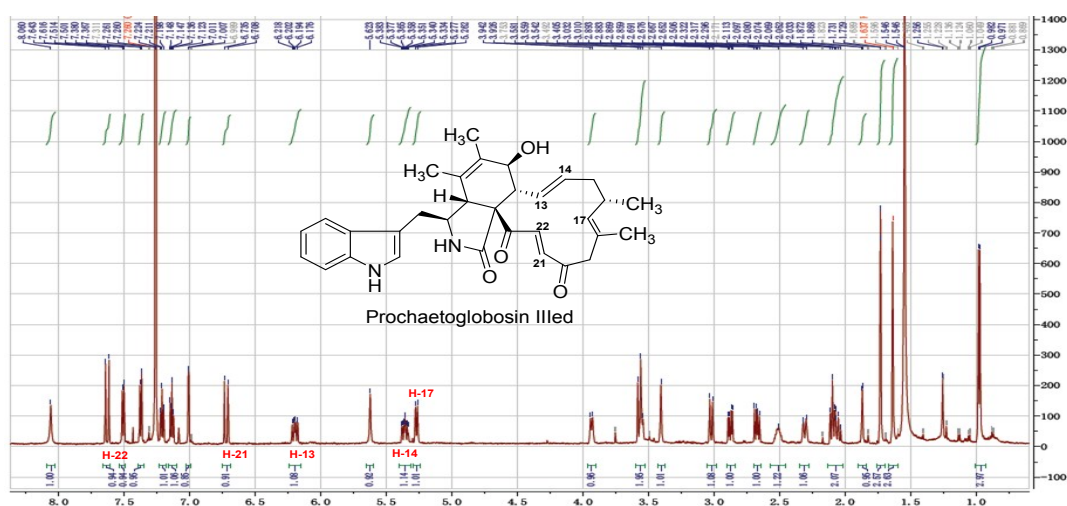

Figure S13. The analysis of  $^1\text{H}$  NMR spectrum of prochaetoglobosin IIIed (**8**) in  $\text{CDCl}_3$

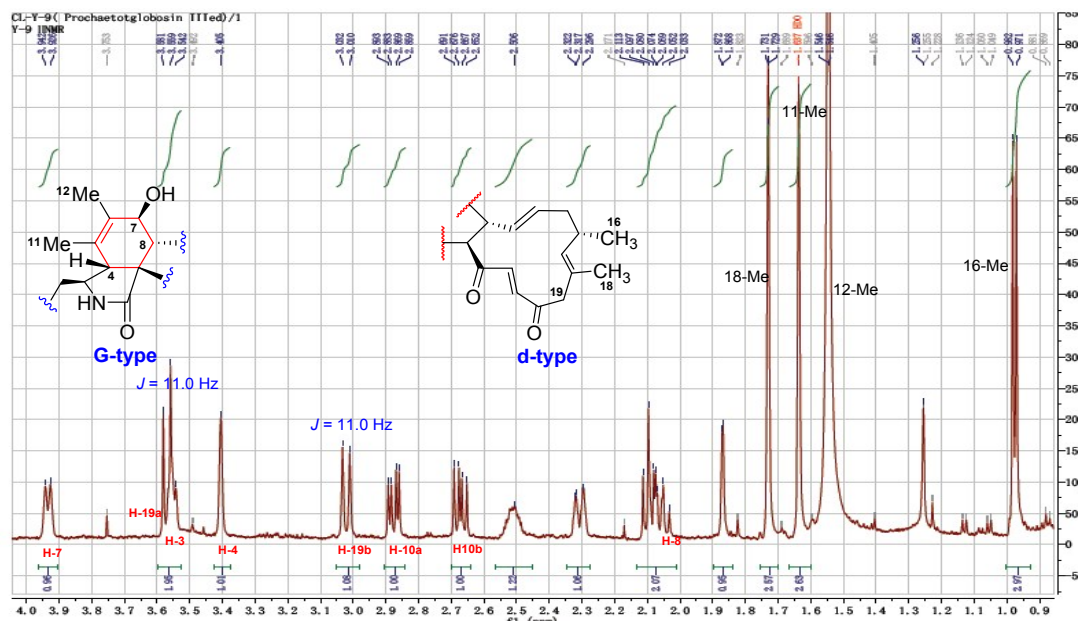

**Figure S14.** The analysis of  $^1\text{H}$  NMR spectrum of prochaetoglobosin IIIed (**8**) in  $\text{CDCl}_3$

Chaetoglobosin D (**9**) = (E-type + e-type)

The  $^1\text{H}$  NMR spectrum of **9** displayed the e-type in the macro-ring system including the diagnostic signals: the  $\alpha$ ,  $\beta$ -unsaturated keto group (C-20-C21-C22-C23), 19-CH, 19-OH, olefinic protons H-13, H-14 and H-17 together with 16-Me and 18-Me (Fig. S15). The typically terminal protons (C=CH<sub>2</sub> at 5.00 ppm), 7-CH (3.68, dd,  $J = 9.6, 6.6$  Hz), 7-OH (4.76, d,  $J = 6.6$  Hz), and 8-H (2.38, t,  $J = 9.6$  Hz) and the doublet signal of 11-Me implied that compound **9** possessed the E-type of perhydroisoindolone moiety (Fig. S15). Thus this compound was determined to be the combination of E-type and e-type, which matches the structural features of chaetoglobosin D.

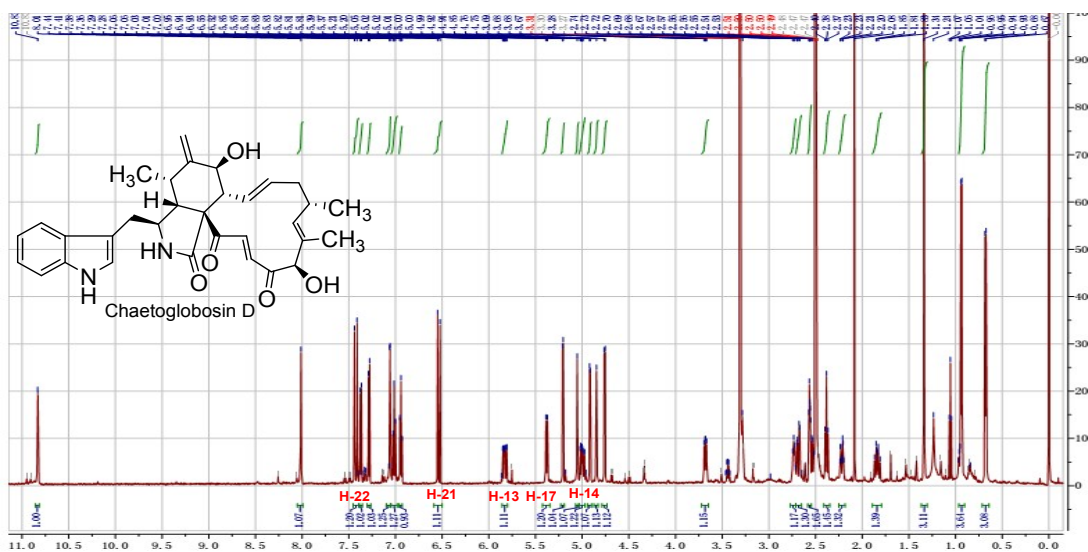

**Figure S15.** The full spectrum of chaetoglobosin D (**9**) in  $\text{DMSO}-d_6$

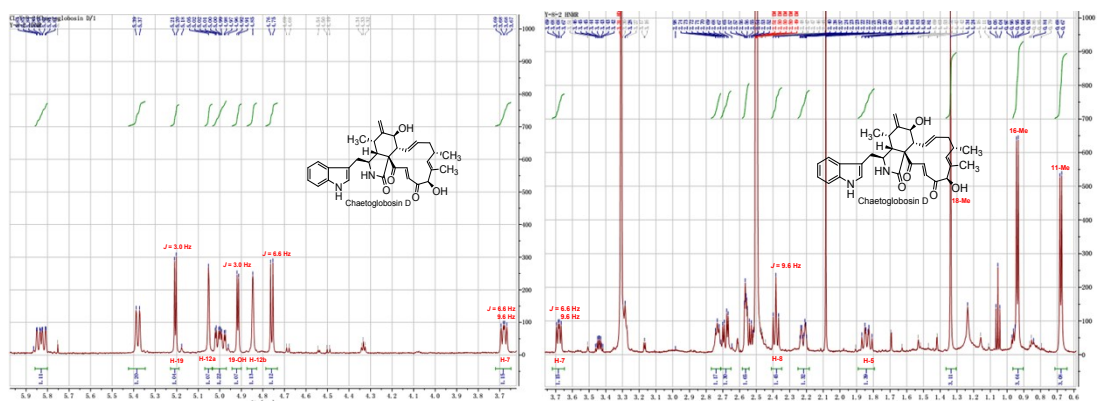

Figure S16. Expanded  $^1\text{H}$  NMR spectrum of chaetoglobosin D (**9**) in  $\text{DMSO}-d_6$



# 1. Structures of A–I sub-types of perhydro-isoindolone moiety (56 analogs)

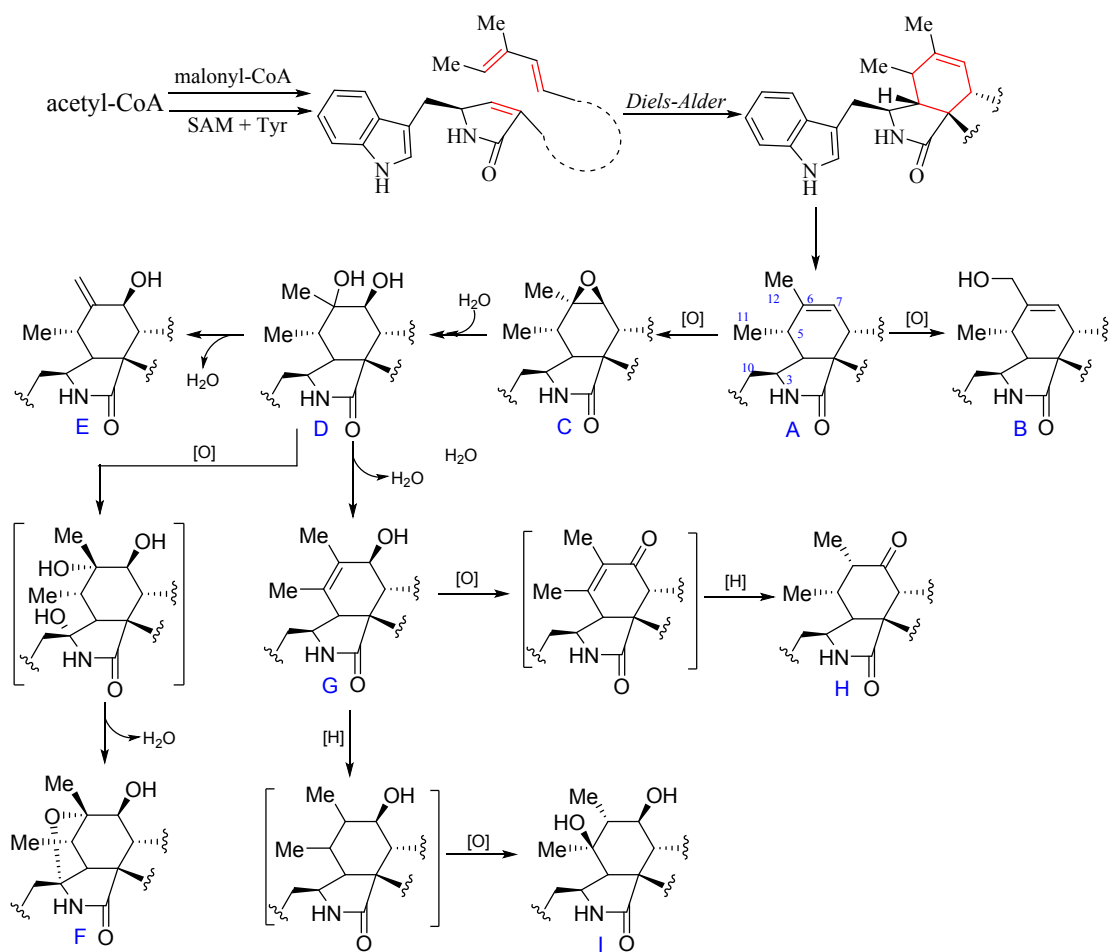

**A-Type:**

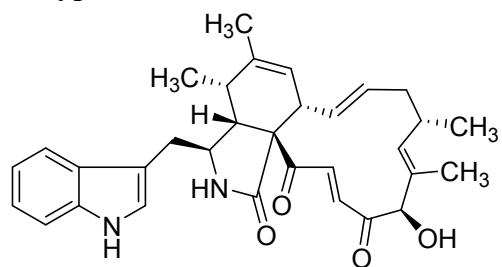

Chaetoglobosin J

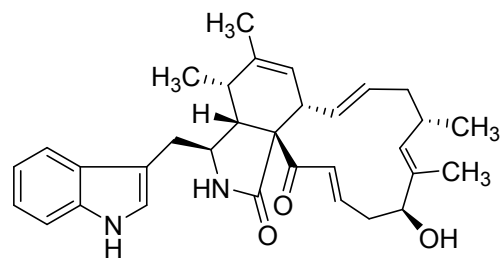

Chaetoglobosin T

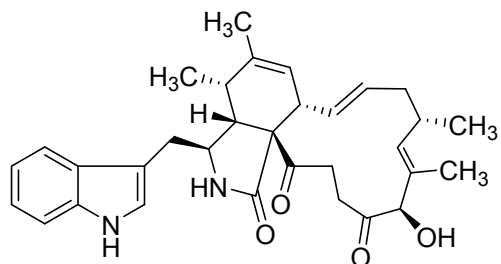

Penochalasin G

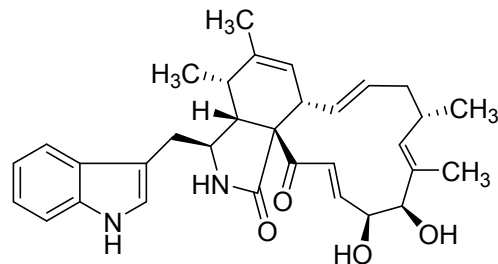

Cytoglobosin D

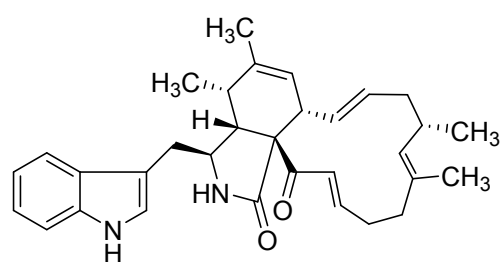

prochaetoglobosin I

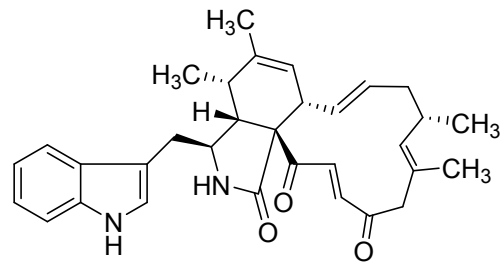

prochaetoglobosin II

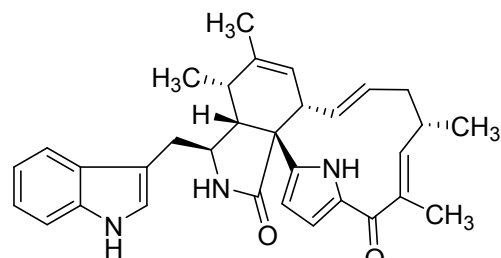

Armochaetoglobosin K

**B-type:**

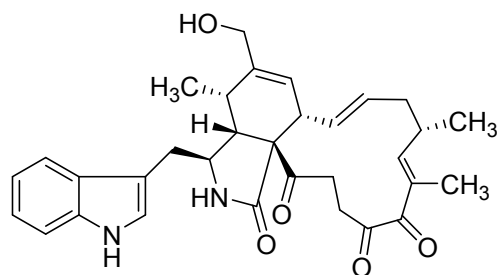

Cytoglobosin E

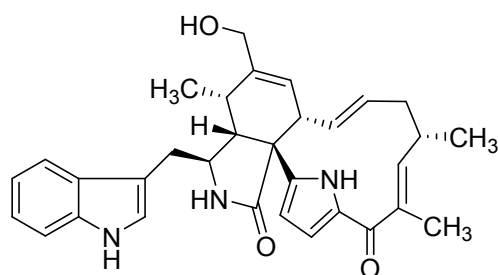

Armochaetoglobosin L

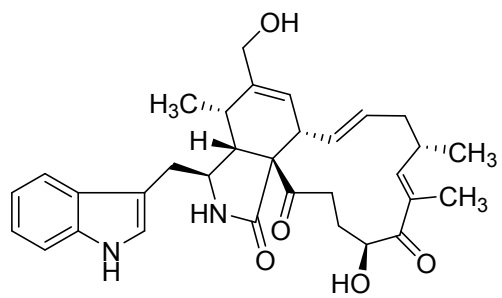

armochaetoglobin W

**C-type:**

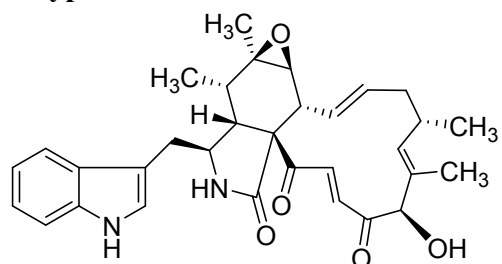

Chaetoglobosin A

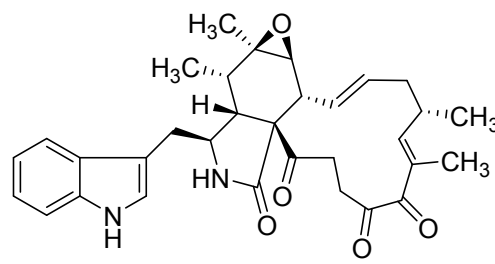

Chaetoglobosin C

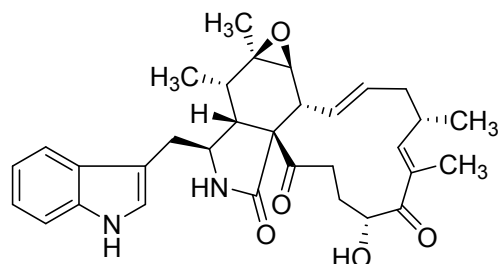

Chaetoglobosin F

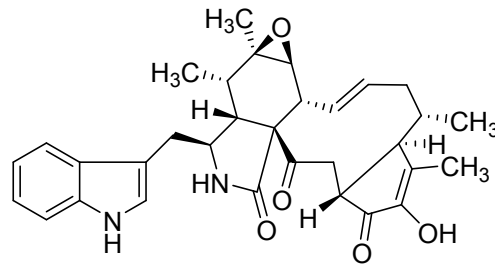

Chaetoglobosin U

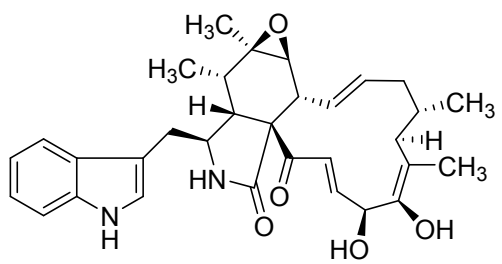

20-dihydrochaetoglobosin A

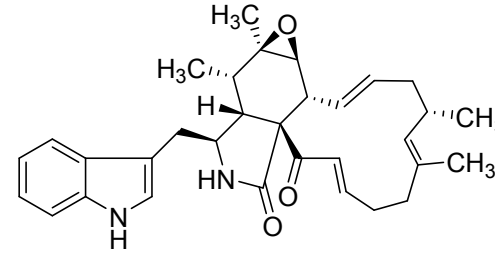

Prochaetoglobosin IV

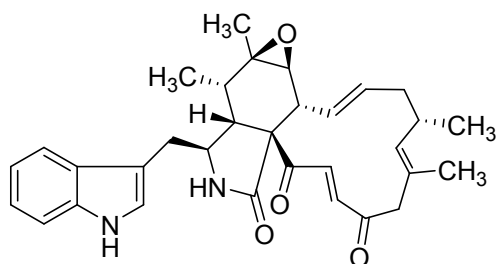

Prochaetoglobosin III

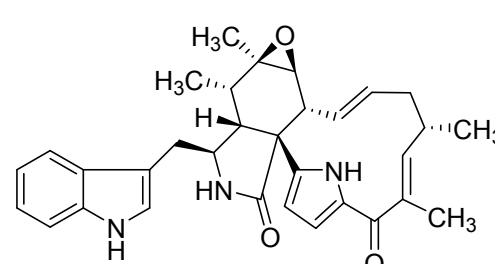

Penochalasin A

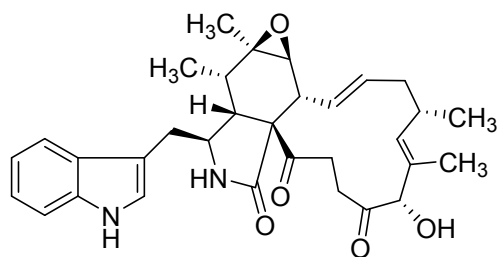

Penochalasin E

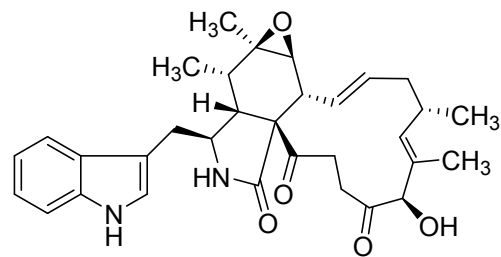

Penochalasin F

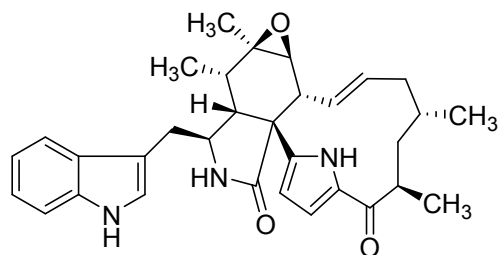

Armochaetogloblin P

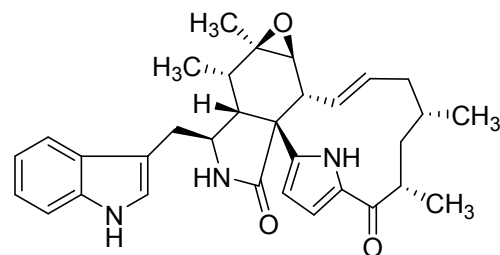

Armochaetogloblin Q

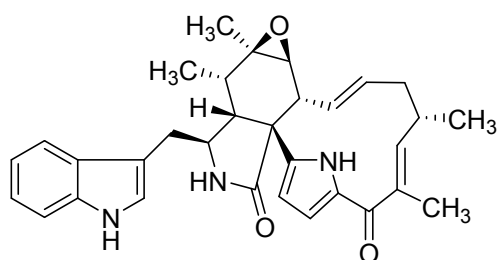

Penochalasin D

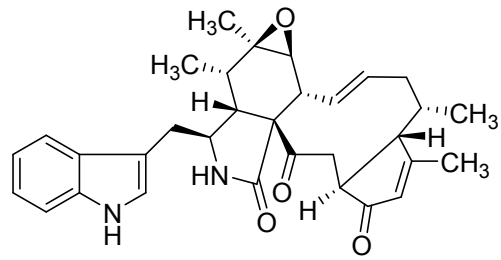

armochaetogloblin Y

**D-type:**

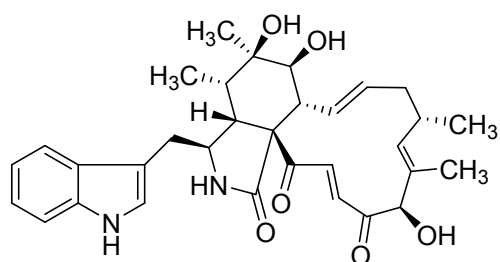

Chaetoglobosin Q

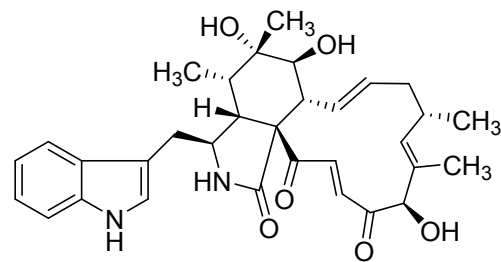

Chaetoglobosin R

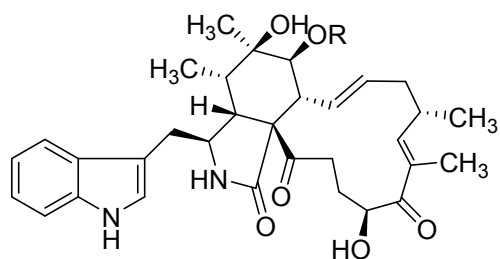

R = H armochaetogloblin S  
R = Ac 7-O-acetylarochaetogloblin S

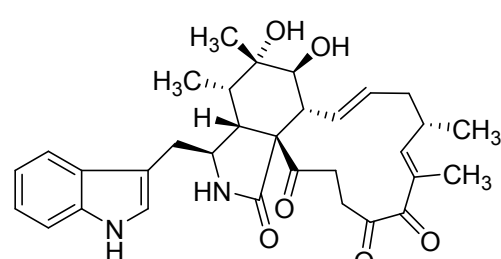

armochaetogloblin U

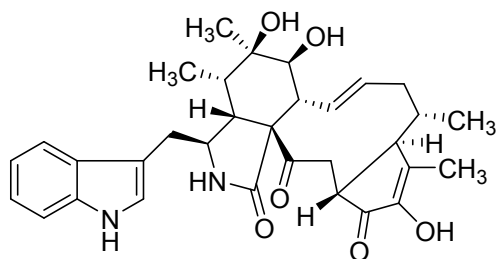

armochaetoglobin X

**E-type:**

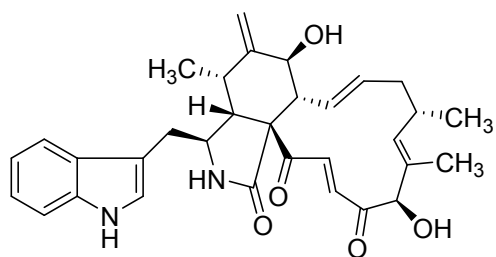

Chaetoglobosin D

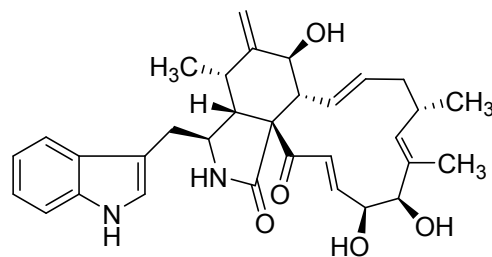

Cytoglobosin B

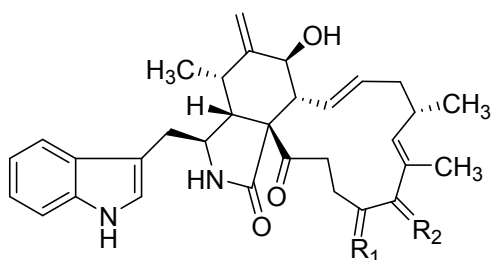

Cytoglobosin F  $R_1 = O, R_2 = H, \beta-OH$   
 Cytoglobosin G  $R_1 = R_2 = H, \beta-OH$   
 Isochaetoglobosin D  $R_1 = R_2 = O$

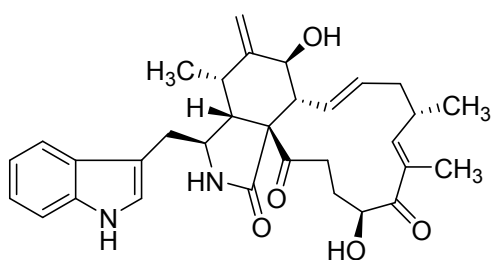

Chaetoglobosin F<sub>ex</sub>

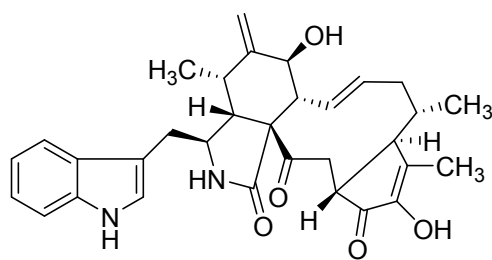

Cytoglobosin A

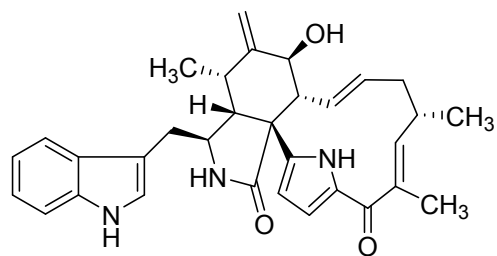

Penochalasin C

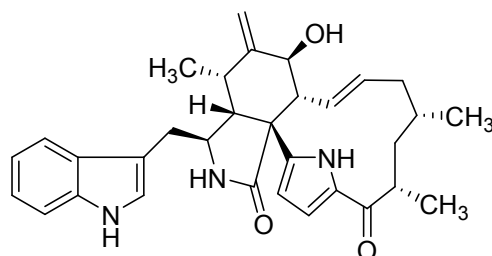

Armochaetoglobin R

**F-type**

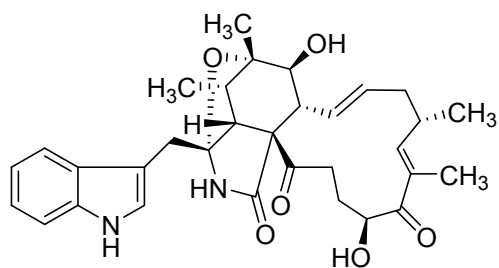

Chaetoglobosin W

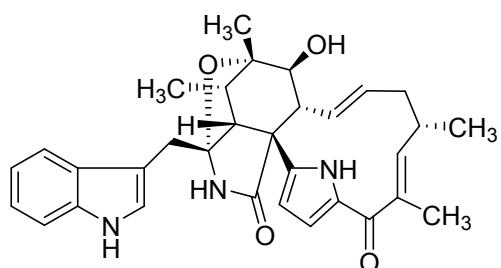

Armochaetoglobosin M

**G-type:**

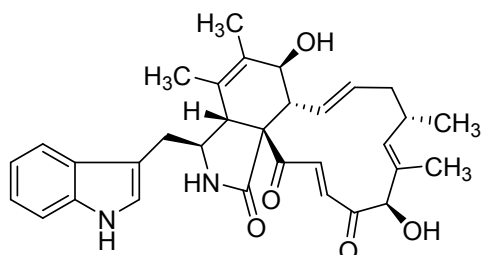

Chaetoglobosin B

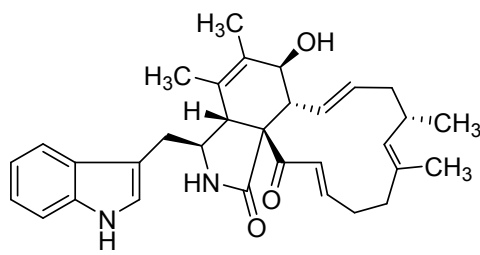

Chaetoglobosin V<sub>2</sub>

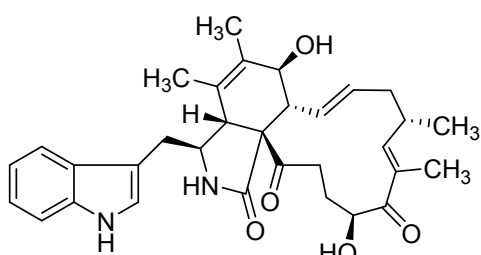

Chaetoglobosin E

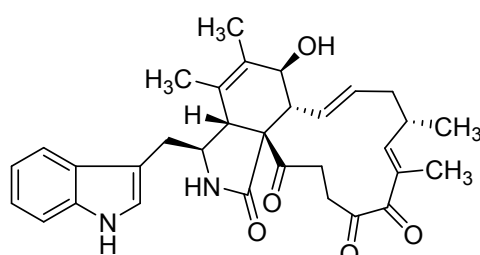

Chaetoglobosin G

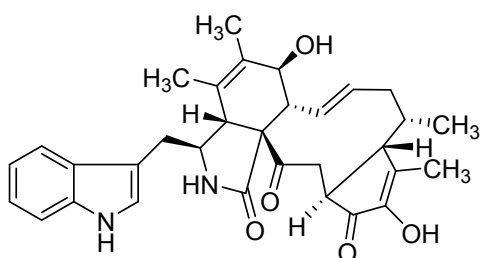

Chaetoglobosin V<sub>1</sub>

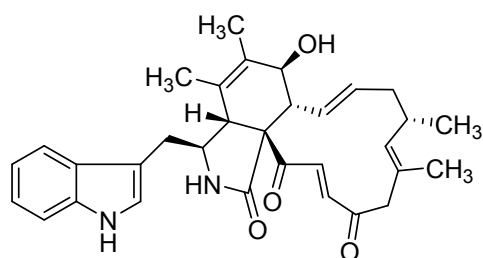

Prochaetoglobosin III<sub>led</sub>

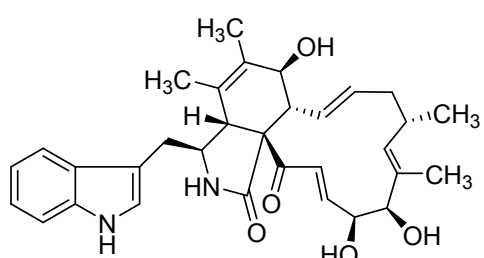

Cytoglobosin C

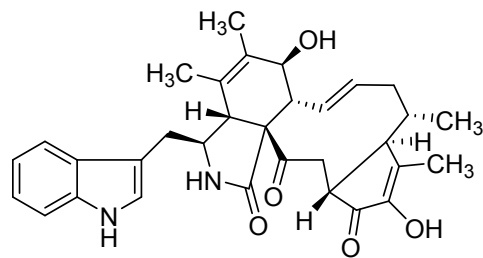

Chaetoglobosin V<sub>b</sub>

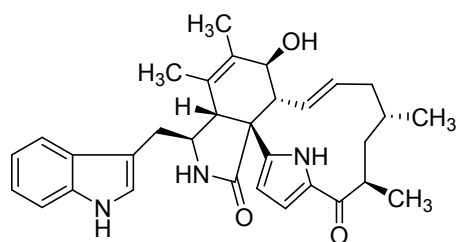

Armochaetogloblin N

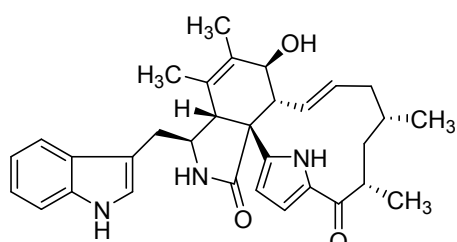

Armochaetogloblin O

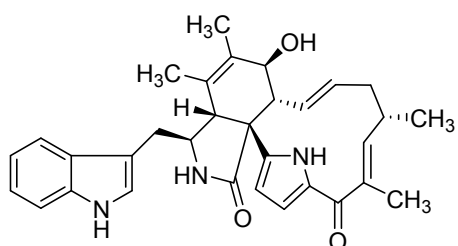

Penochalasin B

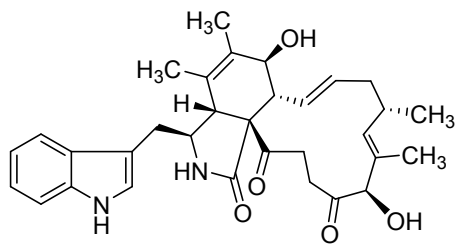

Chaetoglobosin O

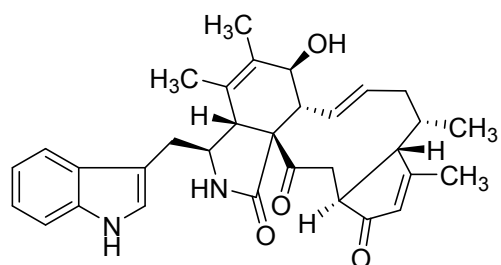

armochaetogloblin Z

**H-type:**

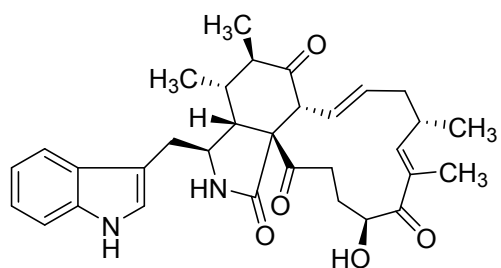

Chaetoglobosin Y

**I-type:**

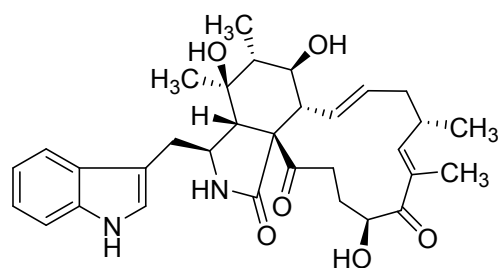

armochaetogloblin V

## 2. Structures of 14 sub-types (a–n types) of macrocyclic ring (56 analogs)

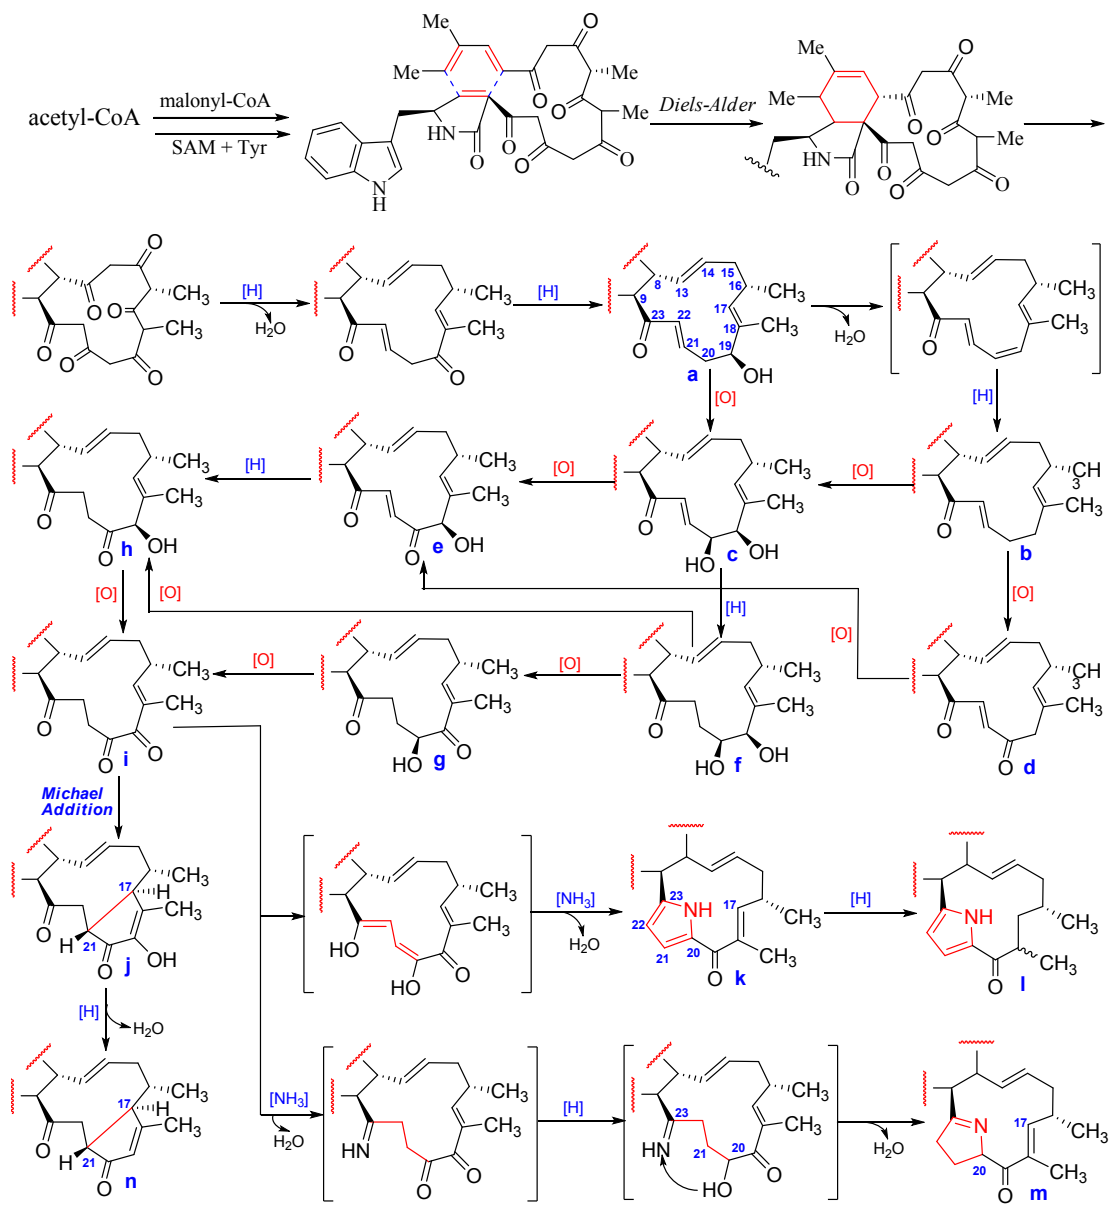



**a-TYPE**

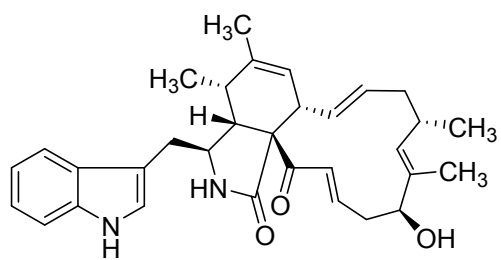

Chaetoglobosin T

**b-TYPE**

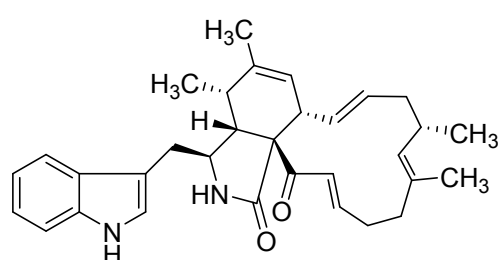

Prochaetoglobosin I

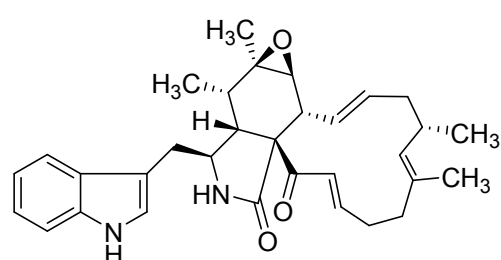

Prochaetoglobosin IV

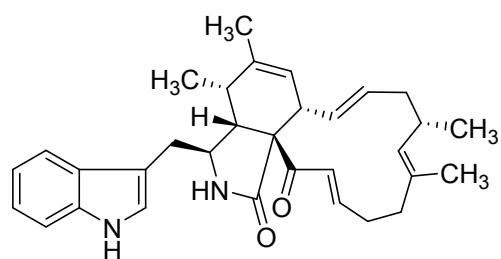

chaetoglobosin V<sub>2</sub>

**c-TYPE**

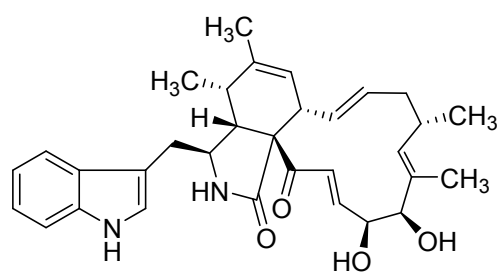

Cytoglobosin D

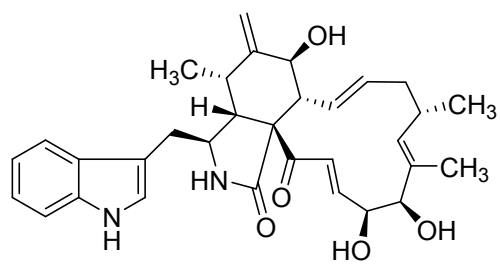

Cytoglobosin B

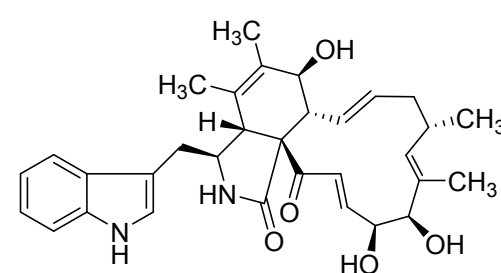

Cytoglobosin C)

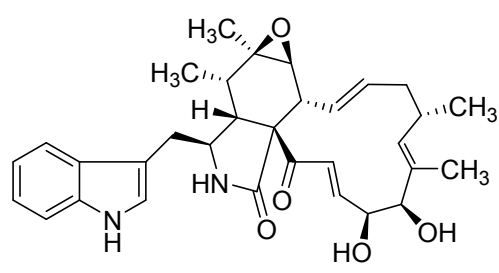

20-dihydrochaetoglobosin A

**d-TYPE**

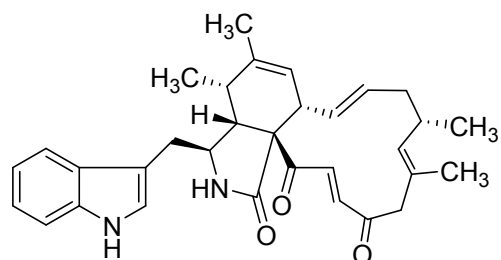

Prochaetoglobosin II

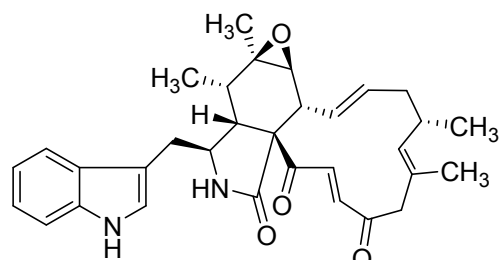

Prochaetoglobosin III

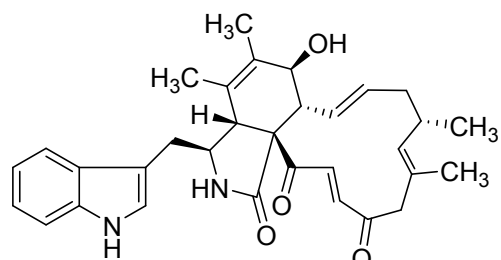

Prochaetoglobosin III<sub>ed</sub>

**e-TYPE**

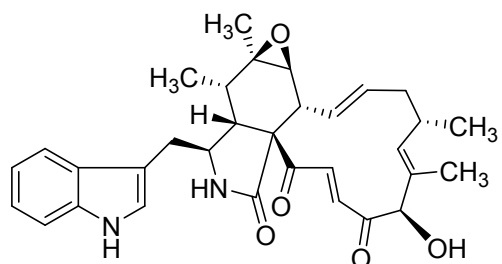

Chaetoglobosin A

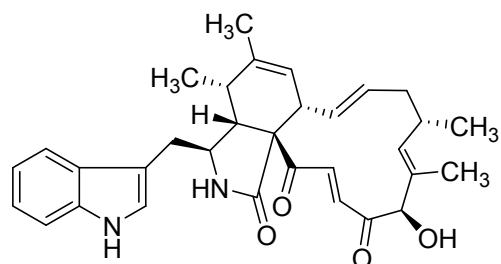

Chaetoglobosin J

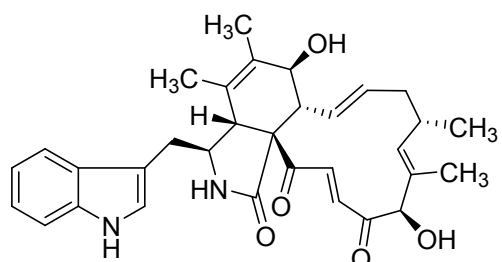

Chaetoglobosin B

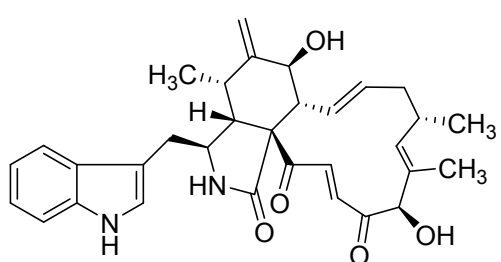

Chaetoglobosin D

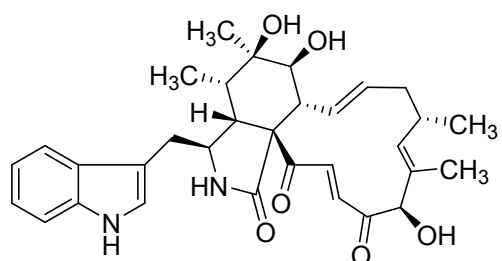

Chaetoglobosin Q

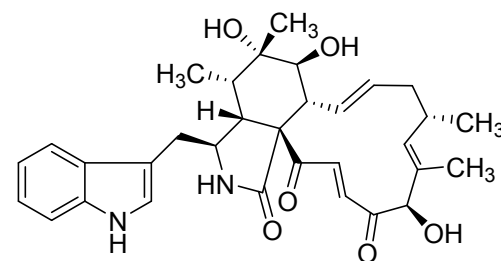

Chaetoglobosin R

**f-TYPE**

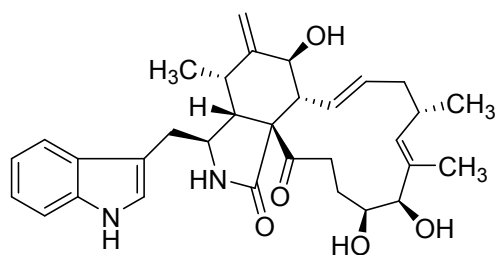

Cytoglobosin G

**g-TYPE**

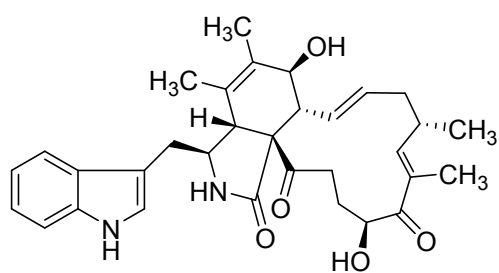

Chaetoglobosin E

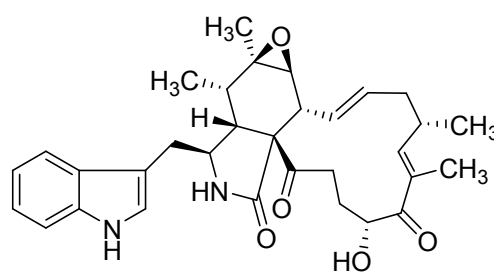

Chaetoglobosin F

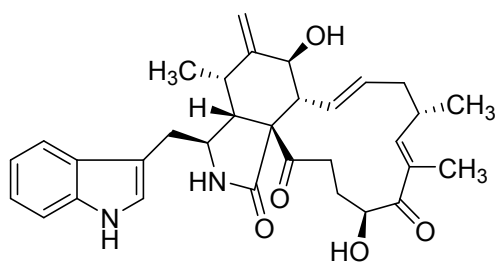

Chaetoglobosin F<sub>ex</sub>

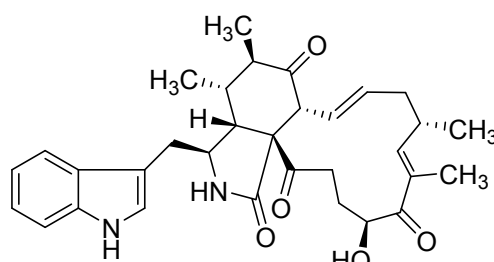

Chaetoglobosin Y

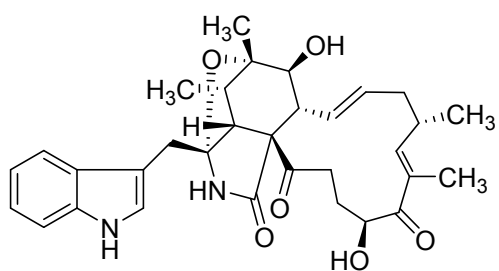

Chaetoglobosin W

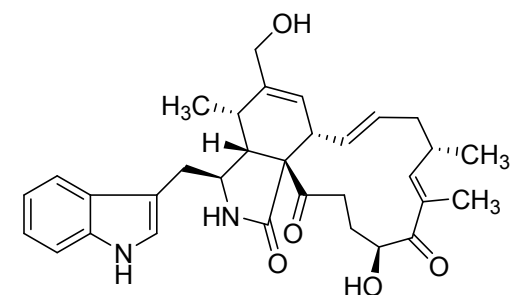

armochaetoglobosin W

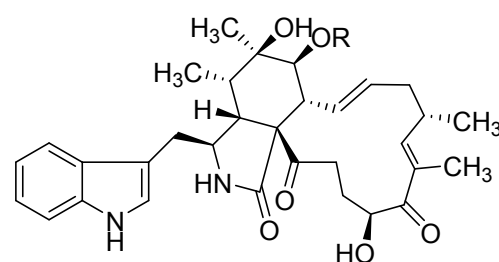

R = H armochaetoglobosin S  
R = Ac 7-O-acetylarochaetoglobosin S

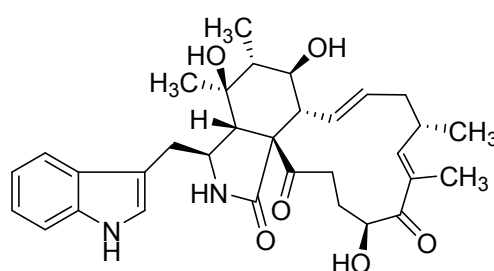

armochaetoglobosin V

**h-TYPE**

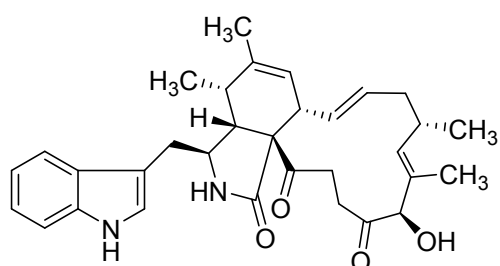

Penochalasin G

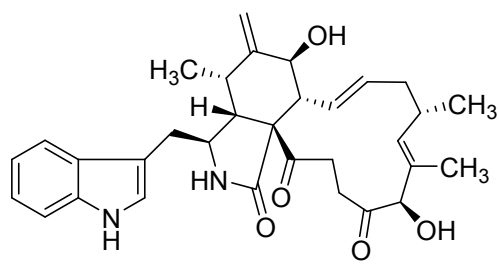

Cytoglobosin F

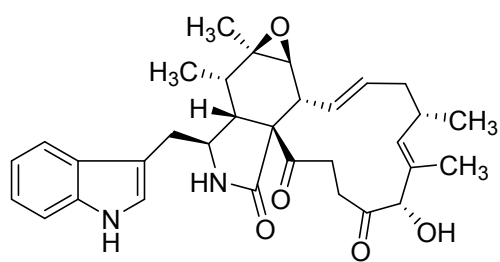

Penochalasin E

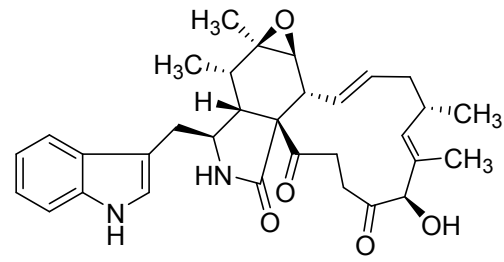

Penochalasin F

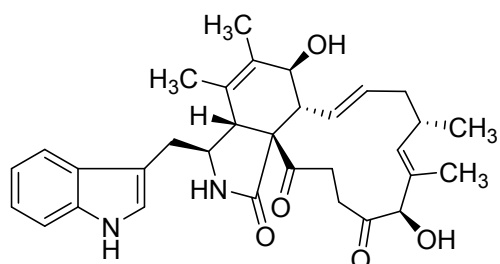

Chaetoglobosin O

**i-TYPE**

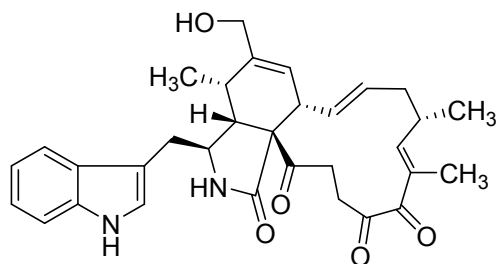

Cytoglobosin E

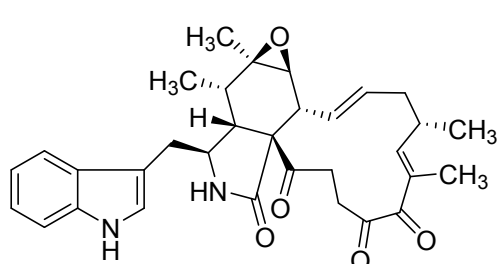

Chaetoglobosin C

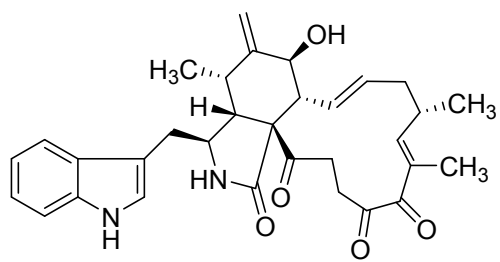

Isochaetoglobosin D

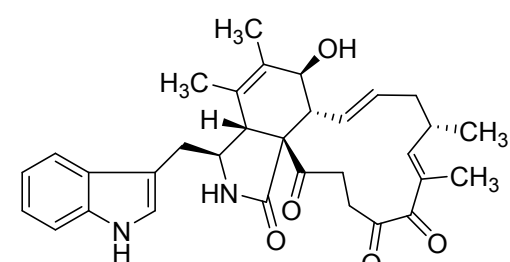

Chaetoglobosin G

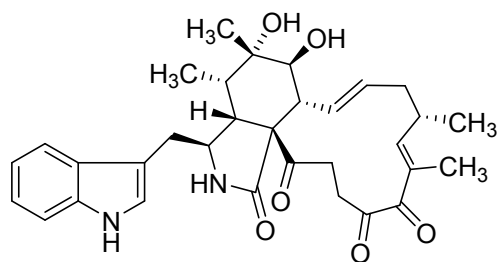

armochaetoglobin U

**j-TYPE**

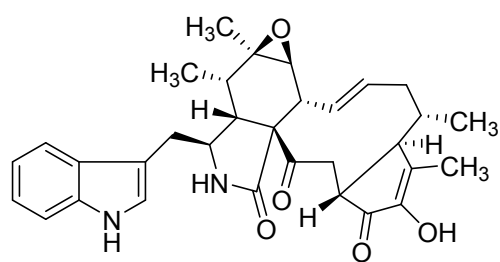

Chaetoglobosin U

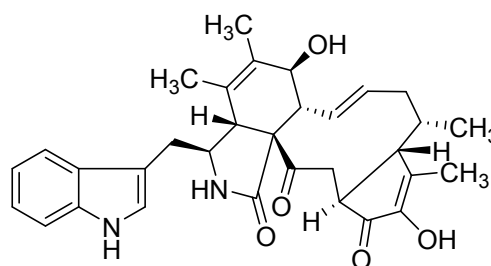

Chaetoglobosin V

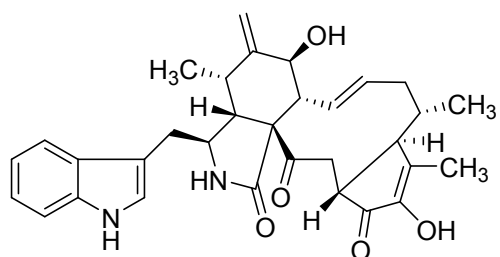

Cytoglobosin A

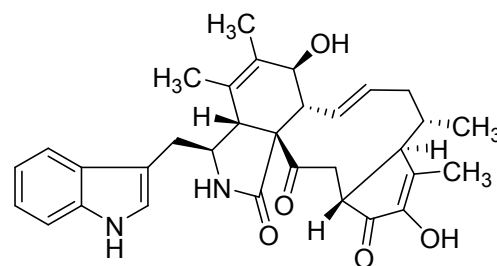

Chaetoglobosin Vb

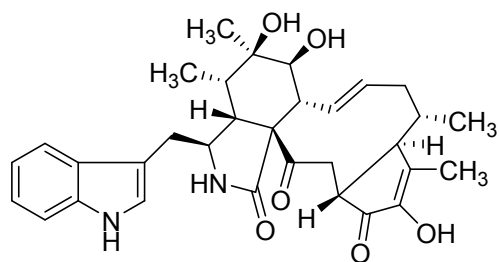

armochaetoglobin X

**k-TYPE**

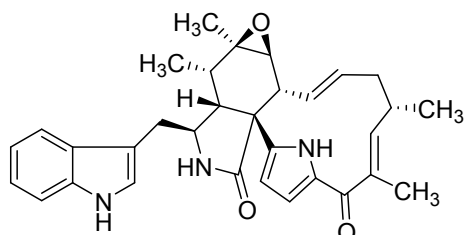

Penochalasin A

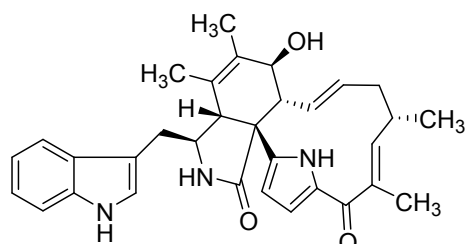

Penochalasin B

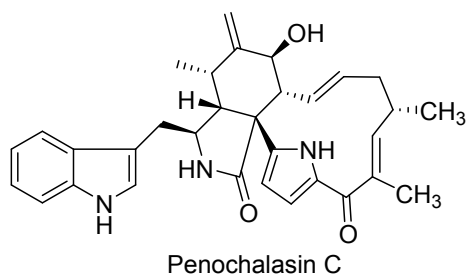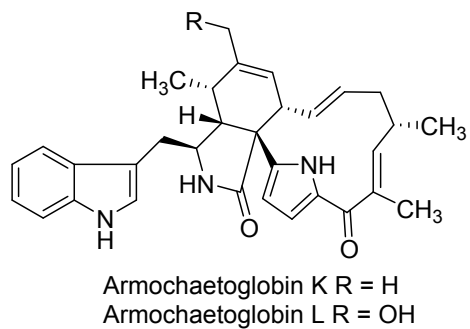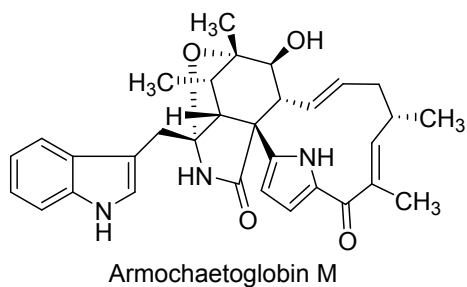

**l-TYPE**

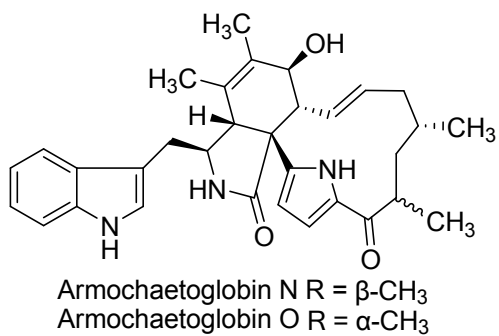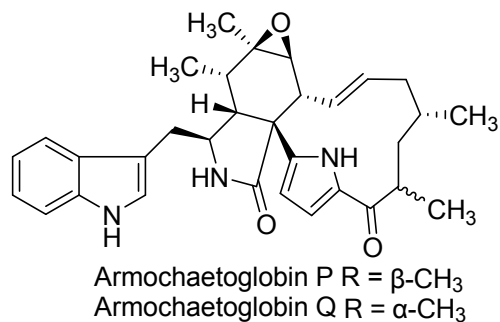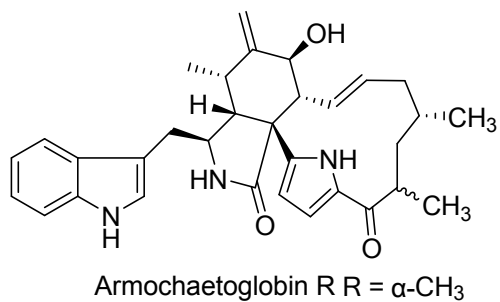

**m-TYPE**

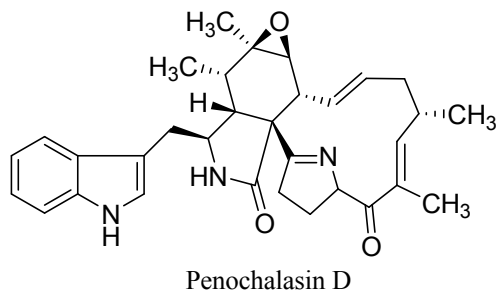

**n-type:**

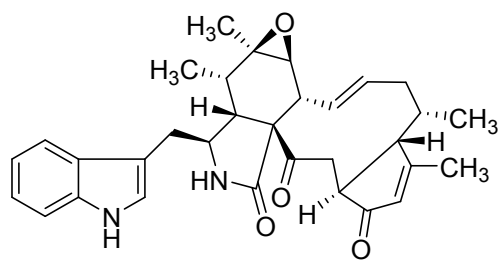

armochaetoglobin Y

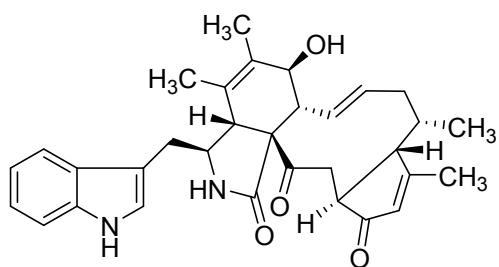

armochaetoglobin Z
